# Supplementary material
Source: Springer Nature journal article supplement (https://www.springermedizin.de/resource/supplementary/12957_2013_1927_MOESM3_ESM.pdf/9562626)

P = 0.0007

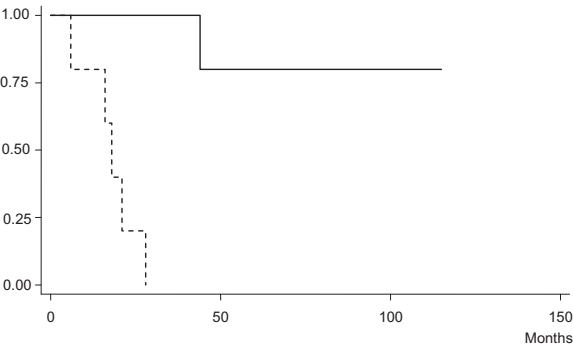

— Pelvic cavity

- - - Pelvic and abdominal cavities

Supplement: MOESM3 [file 9562626]
